# Supplementary material for: n- and p-type ohmic contacts at monolayer gallium nitride–metal interfaces
Source: Royal Society of Chemistry journal article supplement (doi:10.1039/c8cp04759f), 2018-01-01
Supplement: c8cp04759f1.pdf [file c8cp04759f1.pdf]

## **Supporting Information**

# ***N*- and *p*-Type Ohmic Contacts at Monolayer Gallium Nitride-Metal Interfaces**

Ying Guo<sup>1,2,\*</sup>, Feng Pan<sup>1</sup>, Yajie Ren<sup>1</sup>, Binbin Yao<sup>1</sup>, Chuanghua Yang<sup>1</sup>, Meng Ye<sup>4</sup>, Yangyang Wang<sup>5</sup>, Jingzhen Li<sup>2</sup>, Xiuying Zhang<sup>2</sup>, Jiahuan Yan<sup>2</sup>, Jinbo Yang<sup>2,3</sup>, Jing Lu<sup>2,3,\*</sup>

<sup>1</sup>School of Physics and Telecommunication Engineering, Shaanxi Key Laboratory of Catalysis, Shaanxi University of Technology, Hanzhong 723001, P. R. China

<sup>2</sup>State Key Laboratory of Mesoscopic Physics and Department of Physics, Peking University, Beijing 100871, P. R. China

<sup>3</sup>Collaborative Innovation Center of Quantum Matter, Beijing 100871, P. R. China

<sup>4</sup>State Key Laboratory for Superlattices and Microstructures, Institute of Semiconductors, Chinese Academy of Sciences, 100083, P. R. China

<sup>5</sup>Nanophotonics and Optoelectronics Research Center, Qian Xuesen Laboratory of Space Technology, China Academy of Space Technology, Beijing 100094, P. R. China

\*Corresponding author: jinglu@pku.edu.cn, [guosophia@163.com](mailto:guosophia@163.com)

(a) VASP

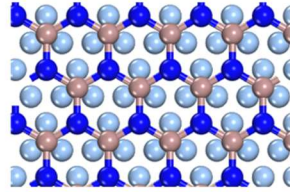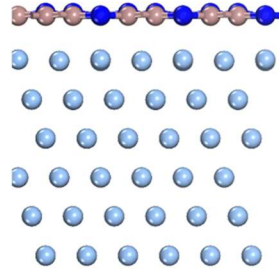

(b) ATK

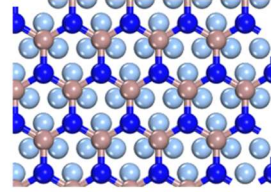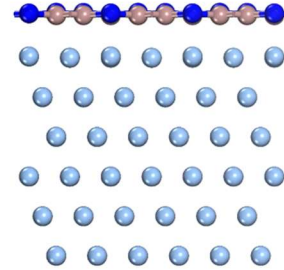

**Figure S1.** Comparison of the ML planar GaN with Ag electrode optimized by ATK and VASP

(a) planar GaN

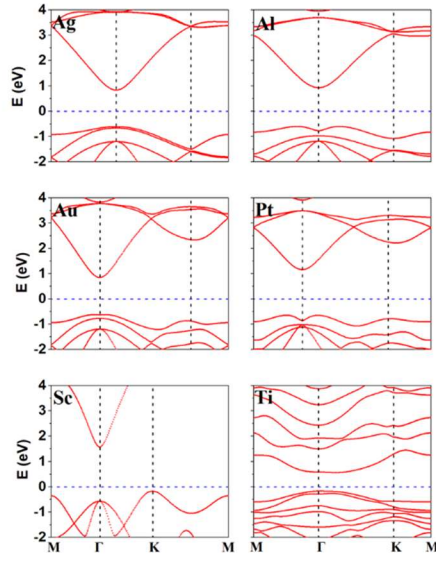

(b) buckled GaN

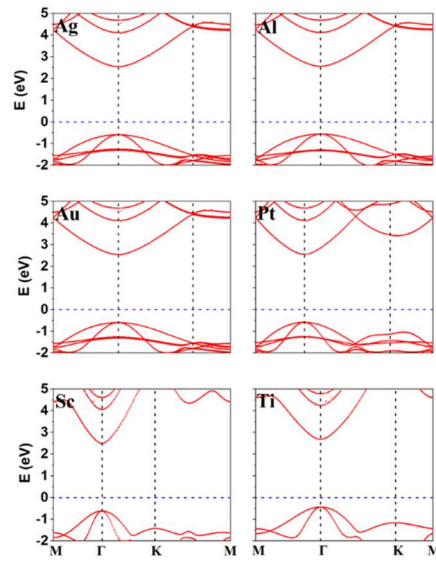

**Figure S2.** (a) Band structures of ML  $\sqrt{3} \times \sqrt{3}$  planar GaN peeled from the stable  $2 \times 2$  Ag, Al, Au, Pt and Ti electrodes and ML  $1 \times 1$  planar GaN peeled from the stable  $1 \times 1$  Sc electrode by the DFT method, respectively. (b) Band structures of ML  $\sqrt{3} \times \sqrt{3}$  buckled GaN peeled from the stable  $2 \times 2$  Ag, Al, Au, and Pt electrodes and ML  $1 \times 1$  buckled GaN peeled from the stable  $1 \times 1$  Sc and Ti electrodes by the DFT method, respectively. The Fermi level is at zero energy. Red dots correspond to the states with significant contribution from ML buckled GaN.

## buckled GaN/metal

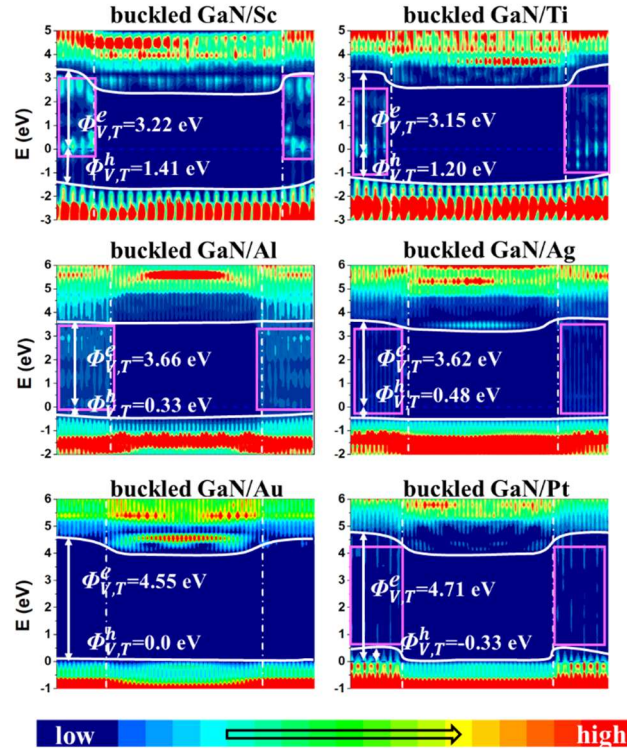

**Figure S3.** Zero-bias and zero-gate voltage LDOS projected on ML buckled GaN of the ML buckled GaN FET with Sc, Ag, Ti, Al, Au, and Pt electrodes, and the channel length is about 5 nm. Light purple closed area indicates the region with MIGS. The Fermi level is at zero energy. The upright white dashed lines indicate the boundary of ML buckled GaN/metal and the uncontacted ML buckled GaN channel. The responding conduction band and valence band profiles along the channel are given in solid white lines. Light purple closed area indicates the region with MIGS.
